# Supplementary material
Source: publisher figshare collection journal article supplement (https://acs.figshare.com/ndownloader/files/7253618)
Supplement: Supplementary file 1 [file 7253618]

**Quantitative global proteomics of yeast PBP1 deletion mutants and their stress responses identifies glucose metabolism, mitochondrial, and stress granule changes**

Gunnar Seidel<sup>1~</sup>, David Meierhofer<sup>1~</sup>, Nesli-Ece Sen<sup>2</sup>, Anika Guenther<sup>1</sup>, Sylvia Krobitsch<sup>1§</sup>, Georg Auburger<sup>2§\*</sup>

**Author Affiliations**

<sup>1</sup> Max Planck Institute for Molecular Genetics, Ihnestr  e 63-73, 14195 Berlin, Germany.

<sup>2</sup> Experimental Neurology, Goethe University Medical School, Theodor Stern Kai 7, 60590 Frankfurt am Main, Germany.

~ joint first authorship

§ joint senior authorship

\* Author to whom correspondence should be addressed:

Georg Auburger, MD, [auburger@em.uni-frankfurt.de](mailto:auburger@em.uni-frankfurt.de), phone +49-69-6301-7428.

**Table of content**

Supporting information

**Supplemental Table 1** – Original MaxQuant output files of all identified protein groups, including LFQ intensities, sequence coverage, and PEP.

**Supplemental Table 2** – Specific comparisons of strains and stress conditions as indicated on individual sheets, using only valid values.

**Supplemental Figure 1** – The Pearson correlation between SM, DB, and BY strains without stress and the two stress conditions heat and NaN3 in scatter plots, indicating biological replicates.
